# Supplementary material
Source: publisher figshare collection journal article supplement (https://acs.figshare.com/ndownloader/files/4044766)
Supplement: Supplementary file 1 [file 4044766]

## Supplemental Data

### **Demonstration of HNE-related aldehyde formation via lipoxygenase-catalyzed synthesis of a *bis*-allylic dihydroperoxide intermediate**

Jing Jin, Yuxiang Zheng<sup>1</sup>, and Alan R. Brash\*

Department of Pharmacology, and the Vanderbilt Institute of Chemical Biology, Vanderbilt University, Nashville, TN 37232

\*Address correspondence to Alan R. Brash, Department of Pharmacology, Vanderbilt University Medical Center, □Nashville, TN 37232-6602; □Tel. 615-343-4495; Fax: 615-322-4707 Email: □alan.brash@vanderbilt.edu

<sup>1</sup> Present address: Weill Cornell Cancer Center, 1300 York Avenue, New York, NY 10065

**Figure S1:** Reaction of arachidonic acid (25  $\mu\text{g/ml}$ ) with recombinant 8*R*-LOX (10  $\mu\text{g/ml}$ ) following over time by repetitive UV scanning (200 – 350 nm).

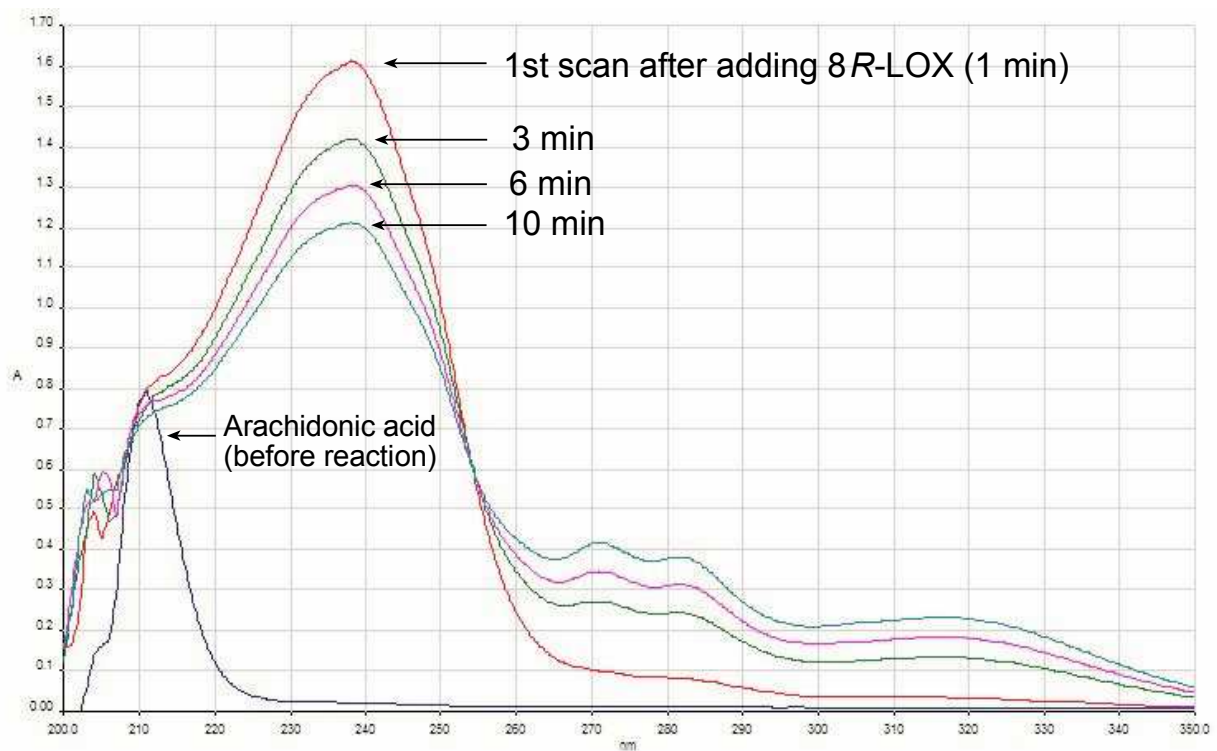

**Figure S2:** SP-HPLC separation of the two main components of peak 1 in Figure 1 of the main text.

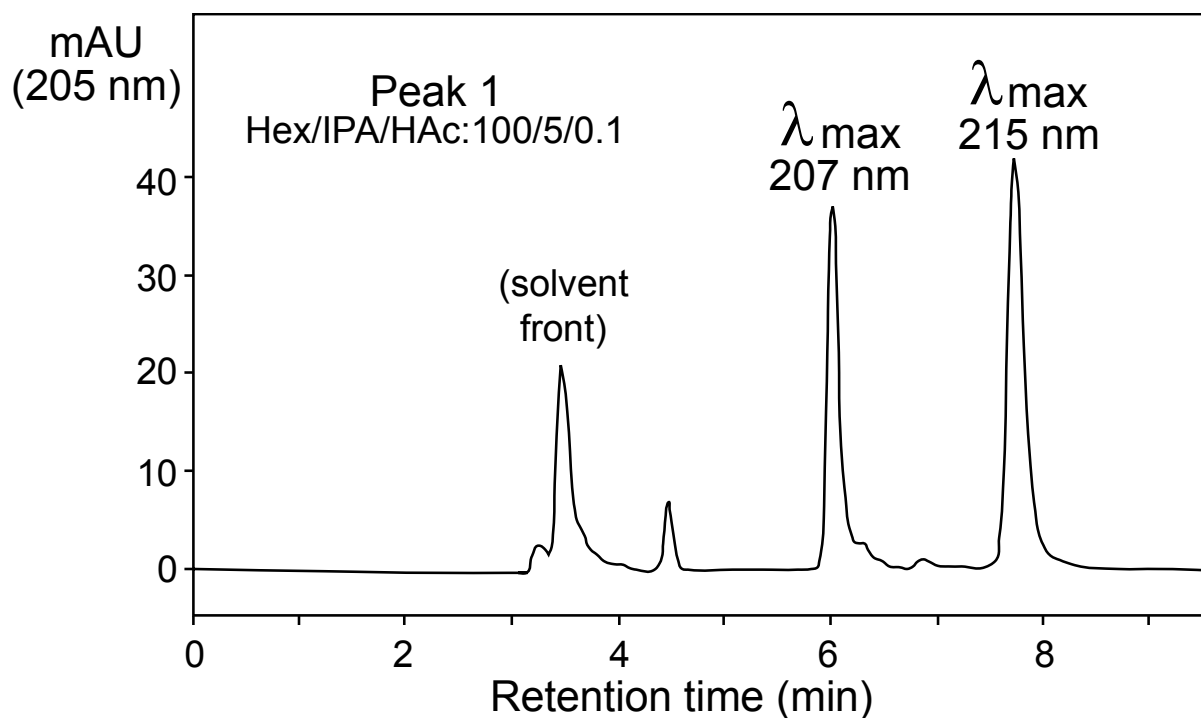

The first of the two peaks was identified as 5-oxo-hept-6-enoic acid (Figure S3); it exhibits a conjugated enone chromophore,  $\lambda_{\text{max}}$  207 nm in the SP-HPLC solvent (and  $\lambda_{\text{max}}$  of 212 nm in RP-HPLC solvent, water/ $\text{CH}_3\text{CN}$ /acetic acid, 70:30:0.01).

The later eluting product on the SP-HPLC chromatogram was identified by NMR as 7-oxo-hept-5E-enoic acid (Figure S4). It has a conjugated enone chromophore with  $\lambda_{\text{max}}$  of 215 nm in SP-HPLC solvent (and 223 nm in RP-HPLC solvent).

**Figure S3:**  $^1\text{H}$ -NMR spectrum of 5-oxo-hept-6-enoic acid (one of the two main components of peak 1 in Figure 1, main text). The spectrum was recorded in  $\text{d}_6$ -benzene at 298K using a Bruker 600 MHz spectrometer.

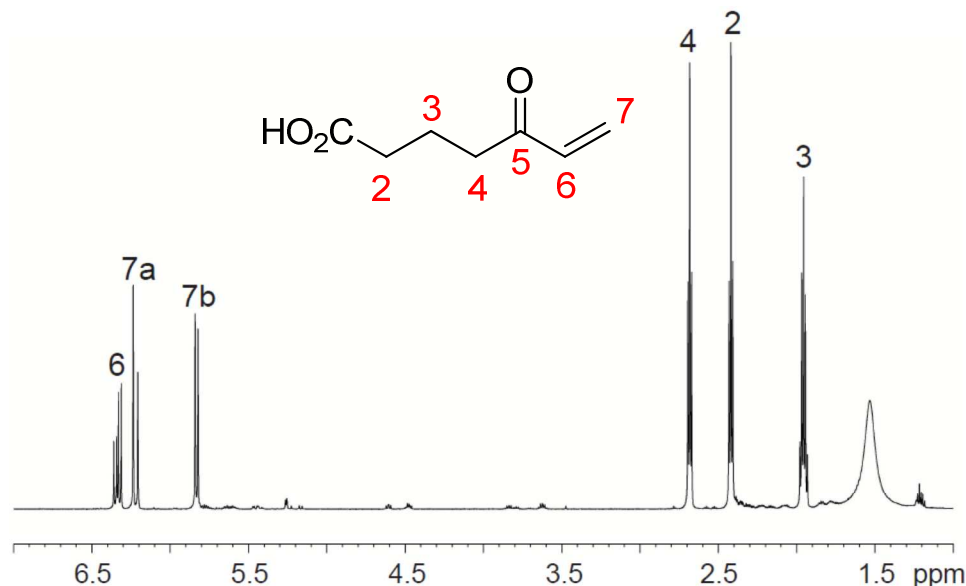

**5-oxo-hept-6-enoic acid.**  $^1\text{H}$ -NMR, 600 MHz,  $\text{CDCl}_3$ , 283K,  $\delta$ 6.34, dd, 1H, H6,  $J_{6,7a} = 17.6$  Hz,  $J_{6,7b} = 10.6$  Hz; 6.22, d, 1H, H7a,  $J_{6,7a} = 17.6$  Hz; 5.83, d, 1H, H7b,  $J_{6,7a} = 10.6$  Hz; 2.69, t, 2H, H4,  $J_{3,4} = 7.2$  Hz; 2.42, t, 2H, H2,  $J_{2,3} = 7.2$  Hz; 1.96, p, 2H, H3,  $J = 7.2$  Hz. Assignments were confirmed by HMBC/HSQC.

The molecular weight was confirmed as 142 by LC-MS (Q-TOF, negative-ESI,  $[\text{M}-\text{H}]^-$  ion, predicted 141.0552, found 141.0557,  $\text{C}_7\text{H}_9\text{O}_3$ ).

The chemical shifts and coupling constants for the enone moiety are very similar to those reported for the synthetic vinyl ketone analogues, 1-octen-3-one and 1,5-octadien-3-one<sup>1</sup>.

This class of enone has been shown to exhibit addition with glycine<sup>2</sup>, and in a recent study exhibit reaction specificity with cysteine<sup>3</sup>.

A proposed mechanism of formation involves a cleavage route suggested by Blank and colleagues for 1-alkene-3-one formation in the autoxidation of arachidonic acid<sup>4</sup>.

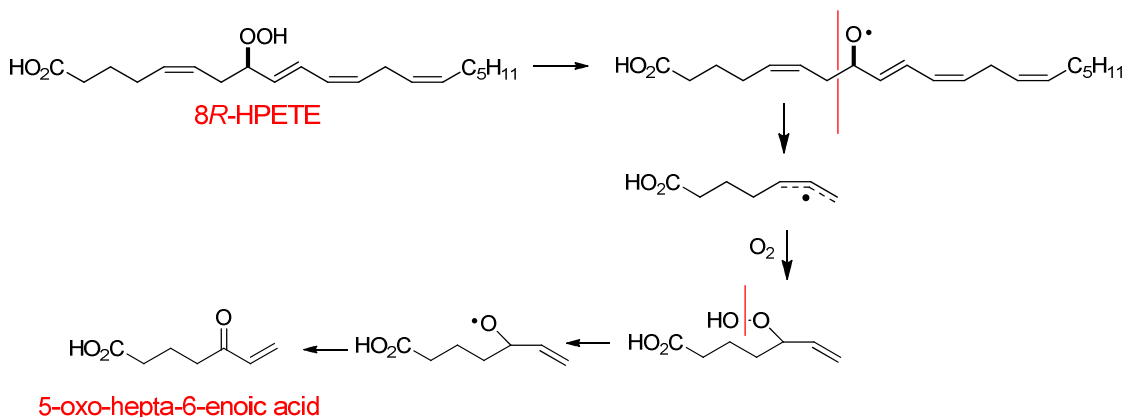

**Figure S4:** COSY NMR spectrum of 7-oxo-hept-5*E*-enoic acid (the second main component of peak 1 in Figure 1, main text). The spectrum was recorded in d6-benzene at 298K using a Bruker 600 MHz spectrometer.

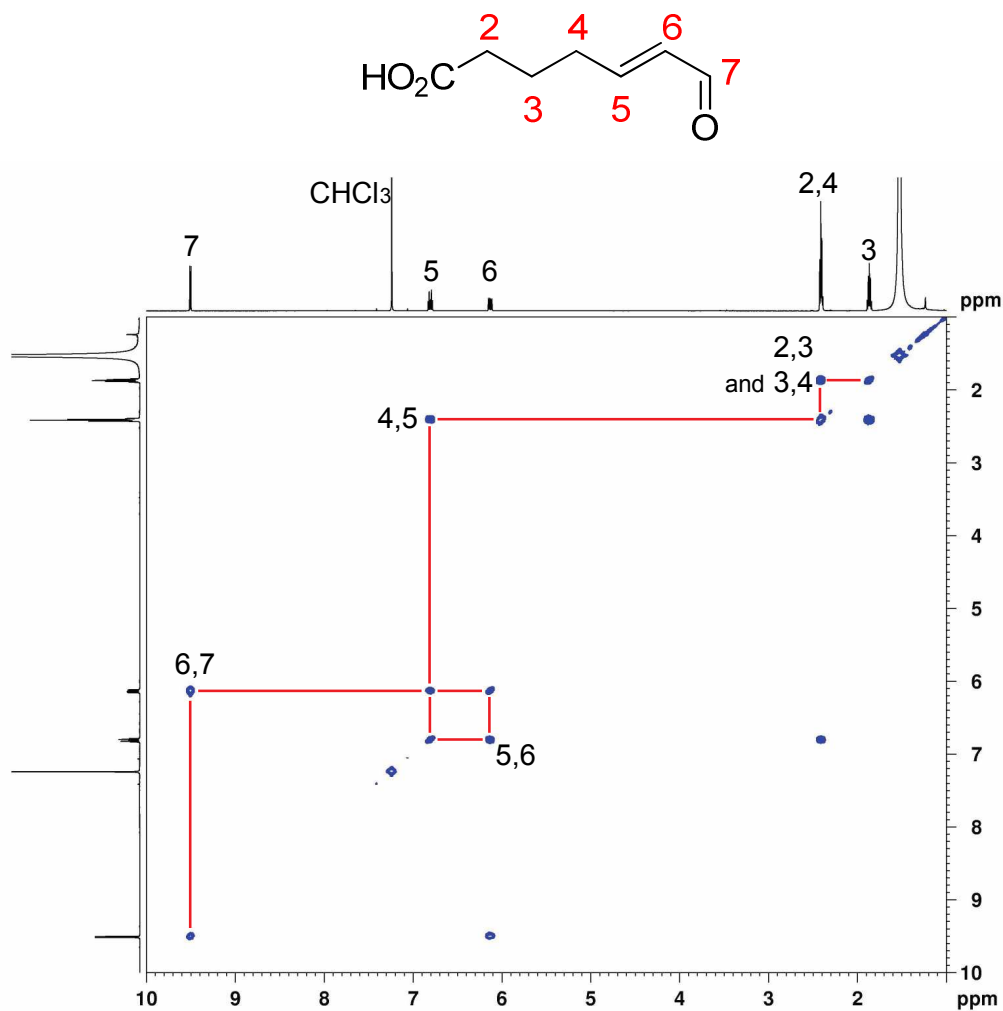

**7-oxo-hept-5*E*-enoic acid.** <sup>1</sup>H-NMR, 600 MHz, CDCl<sub>3</sub>, 283K, δ9.50, d, 1H, H7,  $J_{6,7} = 7.8$  Hz; 6.81, dt, 1H, H5,  $J_{4,5} = 6.7$  Hz,  $J_{5,6} = 15.7$  Hz; 6.13, dd, 1H, H6,  $J_{5,6} = 15.7$  Hz,  $J_{6,7} = 7.8$  Hz; 2.38-2.44, m, 4H, H2, H4; 1.86, p, 2H, H3,  $J_{2,3} = 7.4$  Hz,  $J_{3,4} = 7.4$  Hz.

**Figure S5:** COSY NMR spectrum of 8-hydroperoxy-11-oxo-undeca-5*Z*,9*E*-dienoic acid. The spectrum was recorded in d6-benzene at 298K using a Bruker 600 MHz spectrometer.

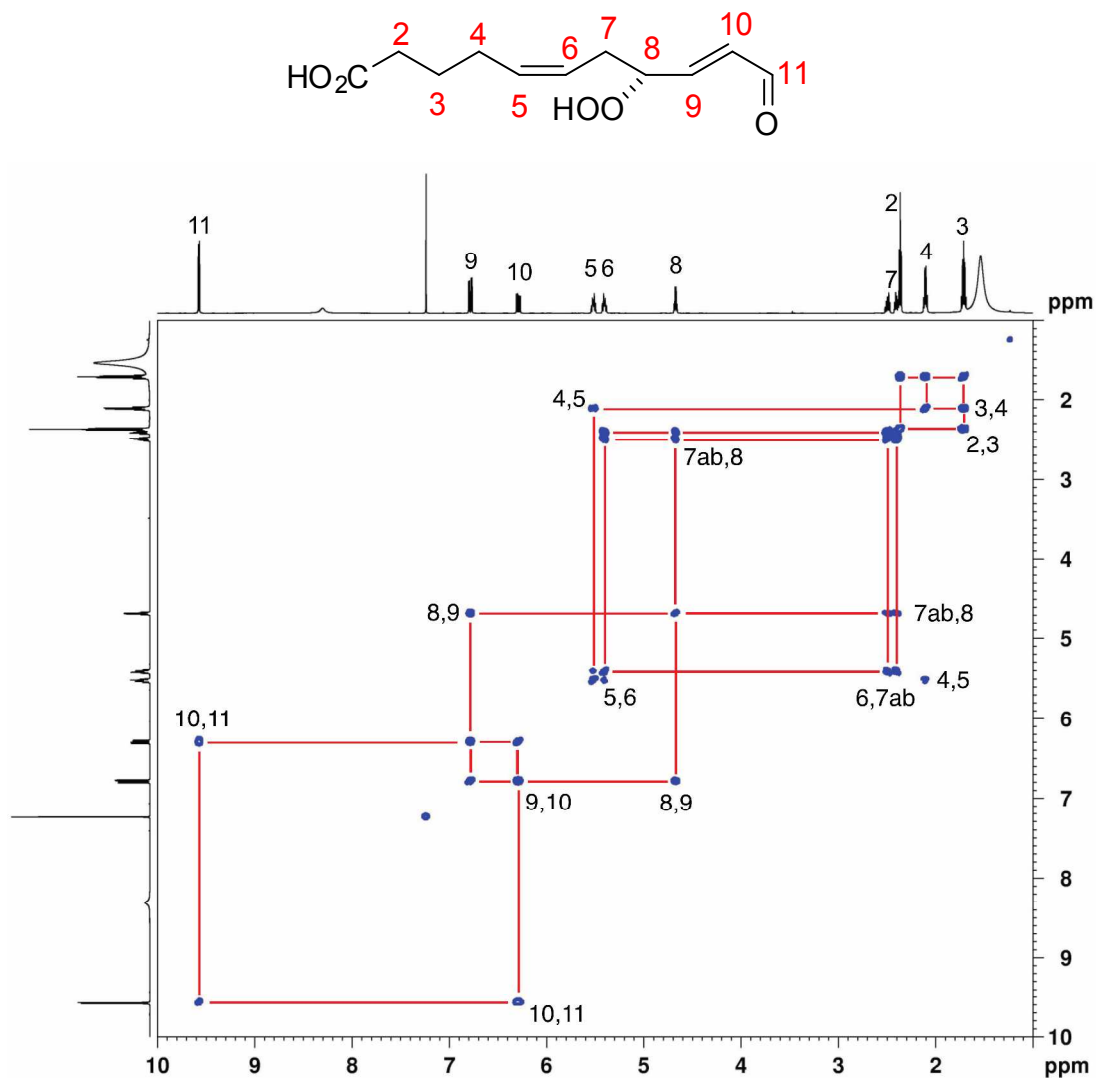

**8-hydroperoxy-11-oxo-undeca-(5*Z*,9*E*)-dienoic acid.**  $^1\text{H}$ -NMR, 600 MHz,  $\text{CDCl}_3$ , 283K,  $\delta$ 9.57, d, 1H, H11,  $J_{10,11} = 7.7$  Hz; 6.78, dd, 1H, H9,  $J_{8,9} = 6.0$  Hz,  $J_{9,10} = 16.0$  Hz; 6.29, dd, 1H, H10,  $J_{9,10} = 16.0$  Hz,  $J_{10,11} = 7.7$  Hz; 5.52, dt, 1H, H5,  $J_{4,5} = 7.2$  Hz,  $J_{5,6} = 10.9$  Hz; 5.41, dt, 1H, H6,  $J_{5,6} = 10.9$  Hz,  $J_{6,7} = 7.3$  Hz; 4.67, q, 1H, H8,  $J_{7,8} = 6.0$  Hz,  $J_{8,9} = 6.0$  Hz; 2.49, m, 1H, H7a; 2.41, m, 1H, H7b; 2.36, t, 2H, H2,  $J_{2,3} = 7.2$  Hz; 2.10, q, 2H, H4,  $J_{3,4} = 7.2$  Hz,  $J_{4,5} = 7.2$  Hz; 1.71, p, 2H, H3,  $J_{2,3} = 7.2$  Hz,  $J_{3,4} = 7.2$  Hz.

**Scheme S1:** Mechanism of formation of 8*R*,15-diHETE (*t,t,t*) and 8*R*,15-diHPETE (*t,c,t* & *t,t,t*)

1. 8*R*,15-diHETE (*t,t,t*)

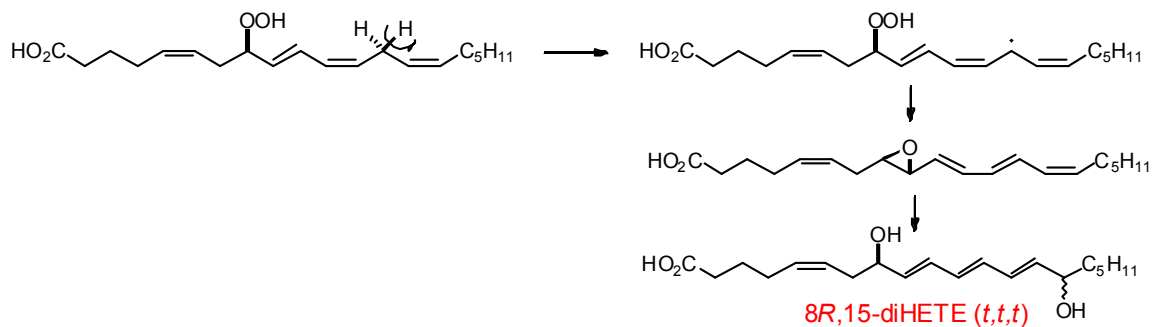

2. 8*R*,15-diHETE (*t,c,t* & *t,t,t*)

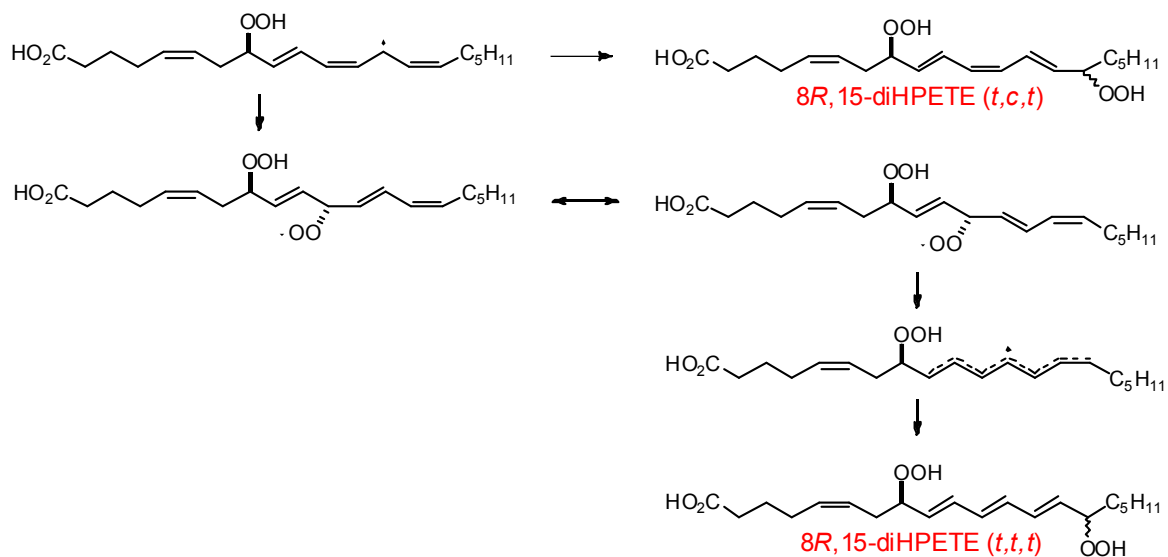

**Figure S6:** GC-MS analysis of 6-hydroperoxy-(2*E*,4*E*)-undecenal TPP-reduced TMS ether methoxime derivative.

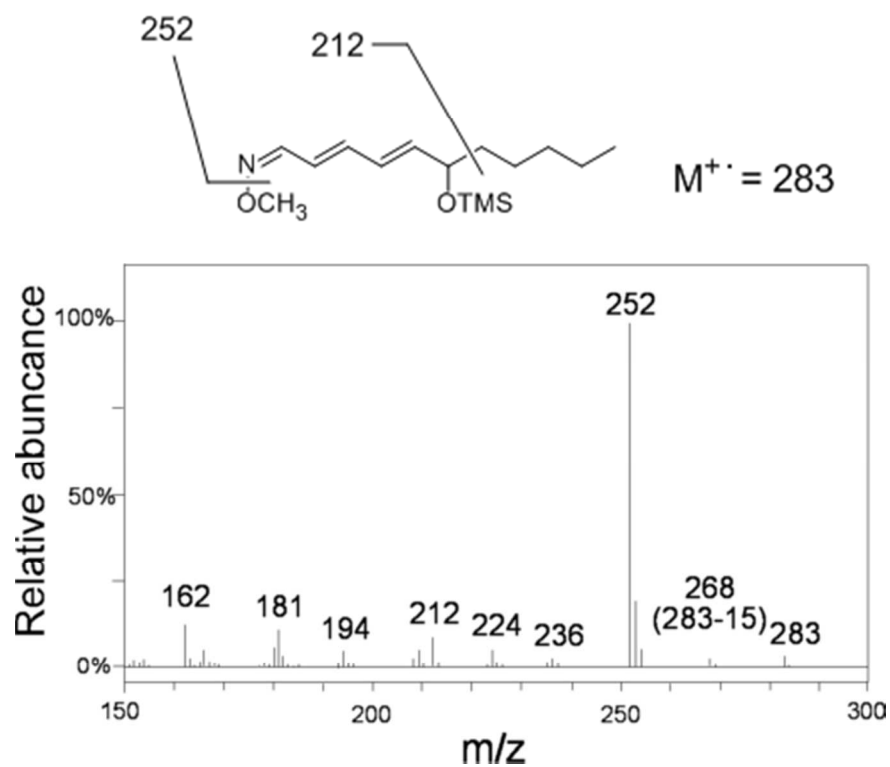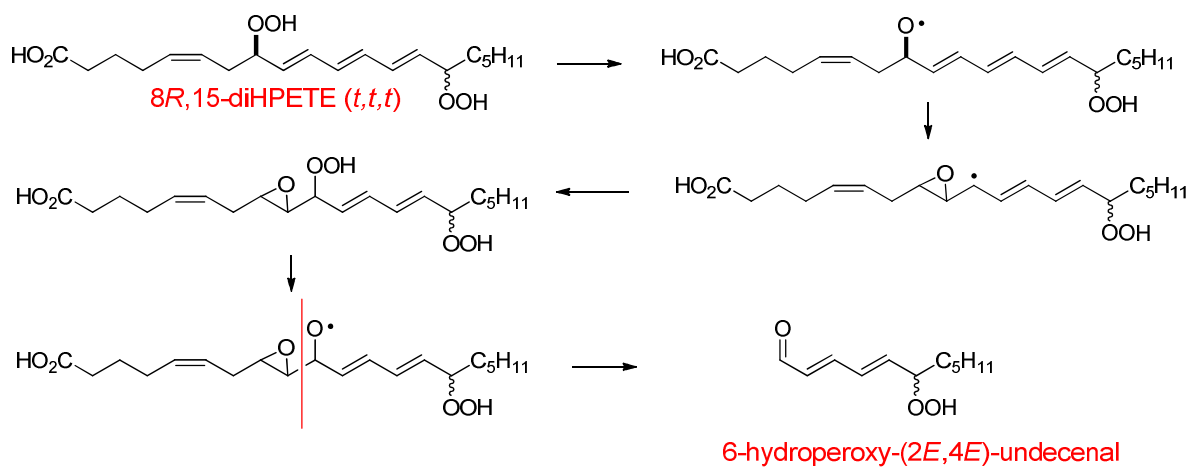



**Figure S7:** COSY NMR spectrum of 6-hydroperoxy-(2*E*,4*E*)-undecenal. The spectrum was recorded in d<sub>6</sub>-benzene at 298K using a Bruker 600 MHz spectrometer.

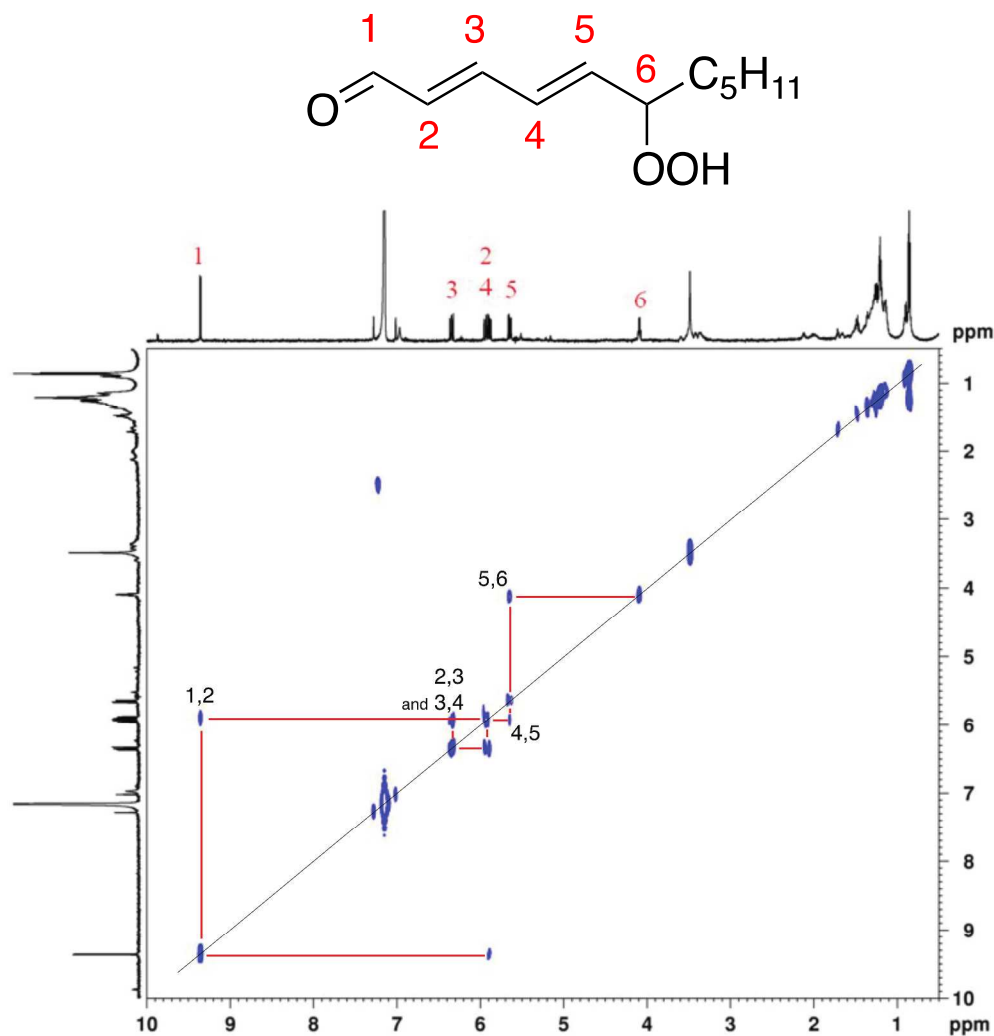

**6-hydroperoxy-(2*E*,4*E*)-undecenal.** <sup>1</sup>H-NMR, 600 MHz, C<sub>6</sub>D<sub>6</sub>, 283K, δ 9.35, d, 1H, H1, J<sub>1,2</sub> = 7.7 Hz; 6.34, dd, 1H, H3, J<sub>2,3</sub> = 15.4 Hz, J<sub>3,4</sub> = 11.0 Hz; 5.86-5.98, m, 2H, H2,H4; 5.65, dd, 1H, H5, J<sub>4,5</sub> = 15.4 Hz, J<sub>5,6</sub> = 7.3 Hz; 4.09, dt, 1H, H6, J<sub>5,6</sub> = 7.3 Hz; J<sub>6,7</sub> = 6.7 Hz.

**Figure S8:** GC-MS analysis of 8-hydroperoxy-(2,4,6)-tridecenal TPP-reduced TMS ether methoxime derivative

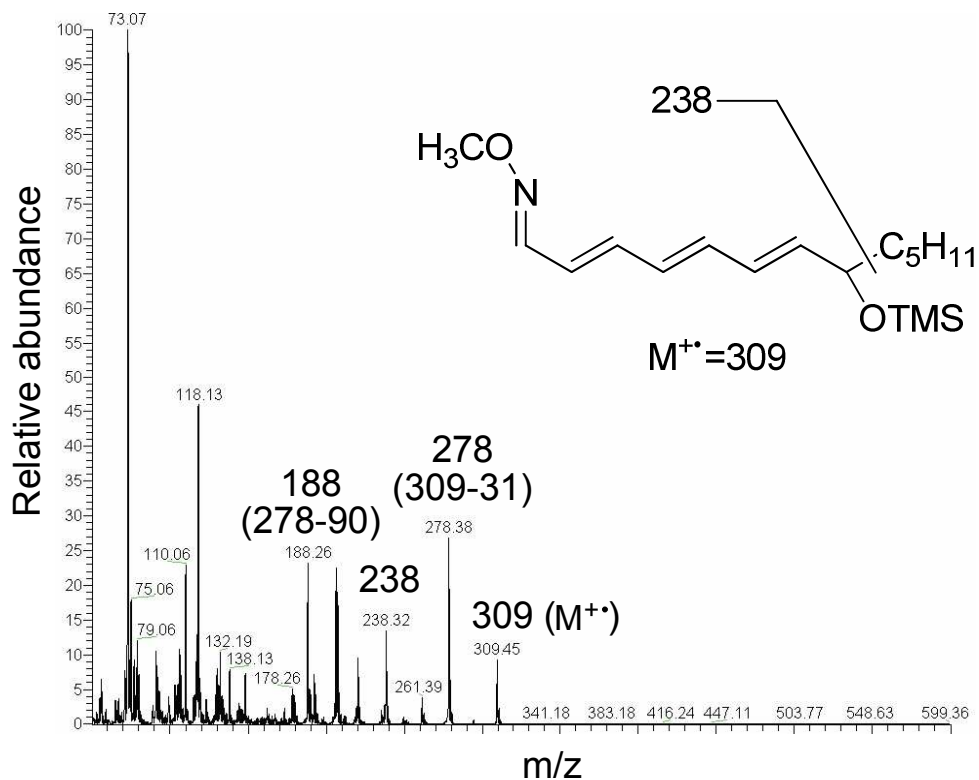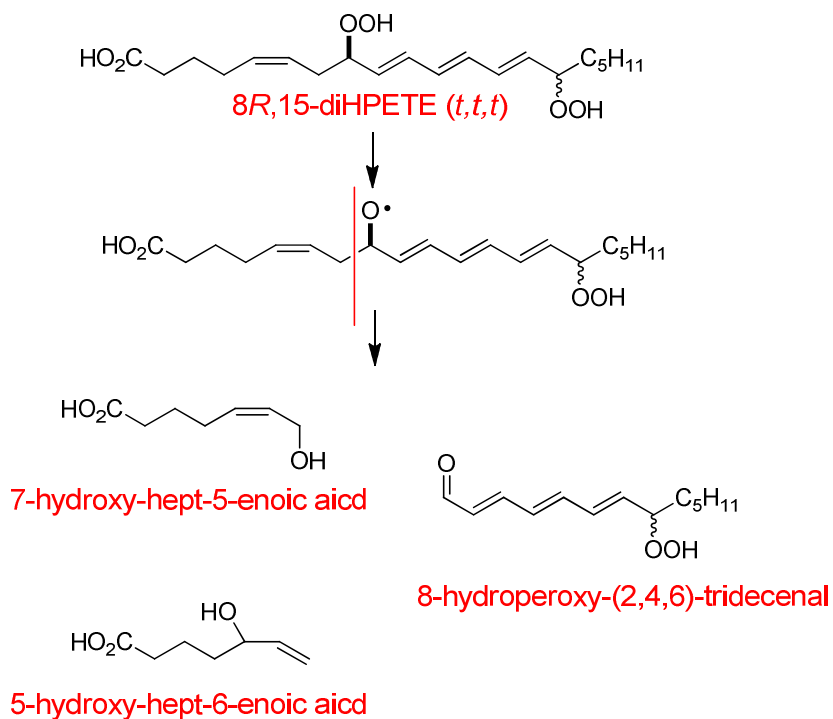

**Figure S9:** RP-HPLC of the reaction of [ $1\text{-}^{14}\text{C}$ ]arachidonic acid with recombinant  $8R$ -LOX after TPP treatment. Column: Waters Symmetry C18, 25 x 0.46 cm; solvent,  $\text{CH}_3\text{CN}/\text{H}_2\text{O}/\text{HAc}$  (10/90/0.01, by volume); flow rate, 1 ml/min; radioactive monitoring (Radiomatic Flo-One).

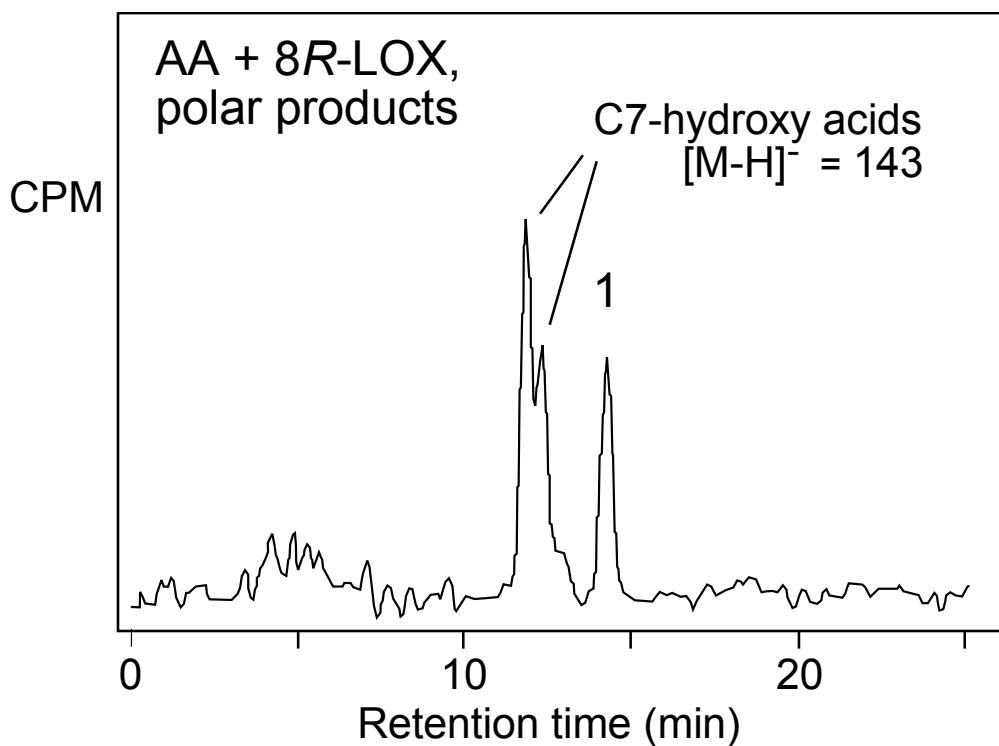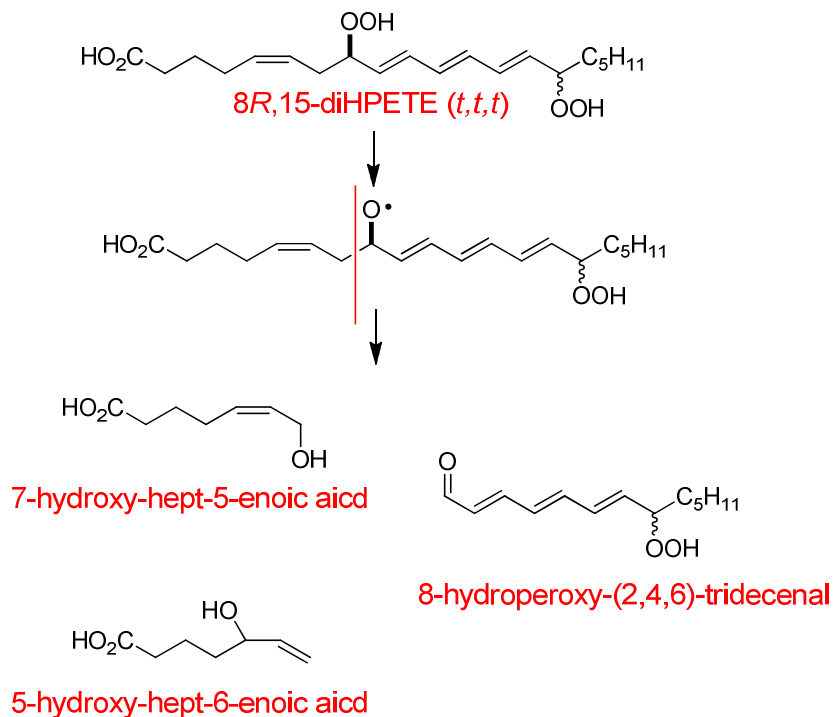

**Figure S10:** RP-HPLC analyses of room temperature reactions of 15S-HPETE with mouse platelet-type 12S-LOX (top) and human 15-LOX-1 (below). Column: Waters Symmetry C18, 25x 0.46 cm; solvent, CH<sub>3</sub>CN/H<sub>2</sub>O/HAc (45/55/0.01, by volume); flow rate, 1 ml/min; on-line diode array detection. (The retention time difference between the two chromatograms is due to the use of different columns).

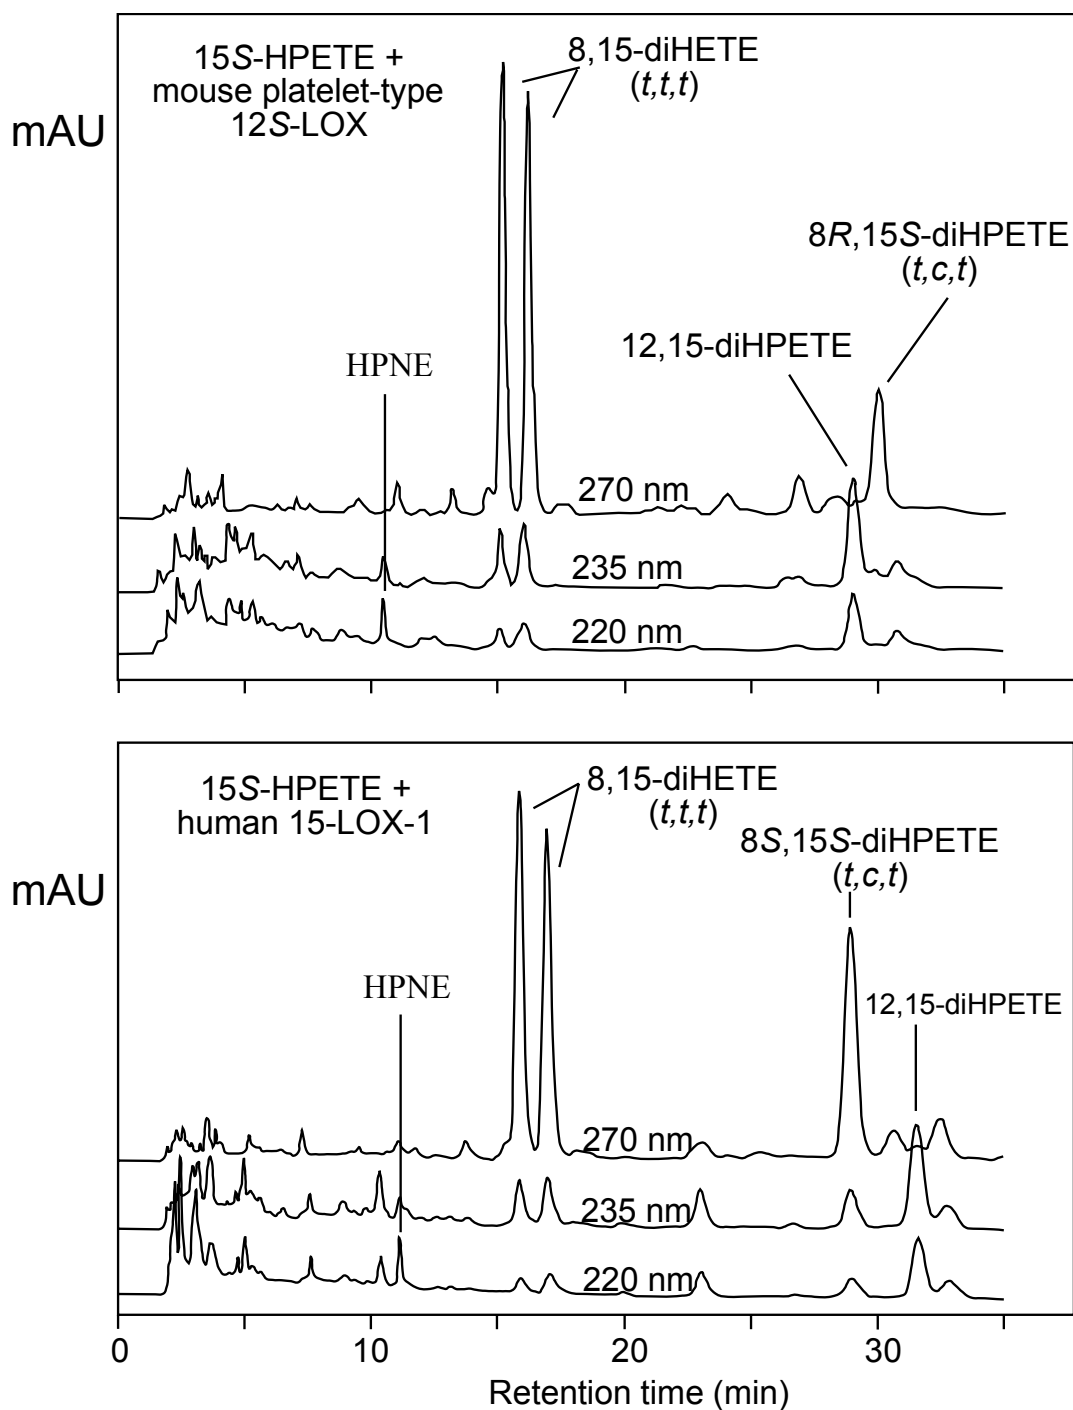

**Figure S11:** Overlay of the UV spectra of 8*R*,11*R*-HPETE and 12*S*,15*S*-diHPETE

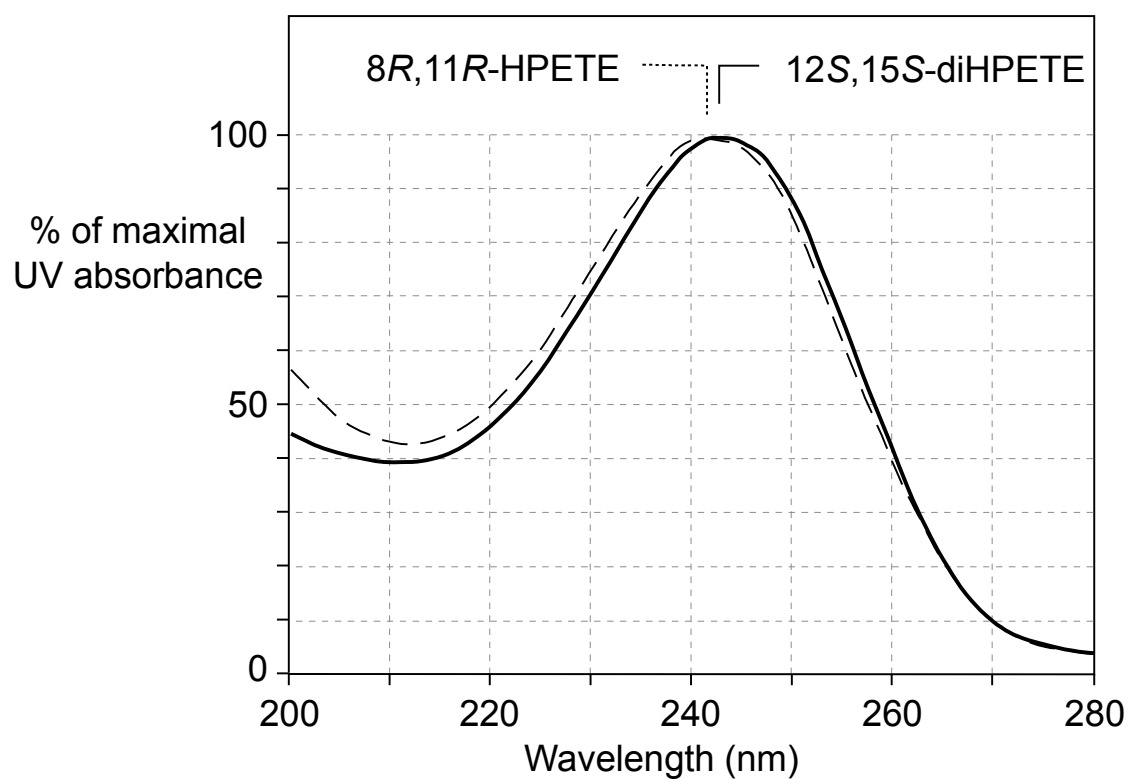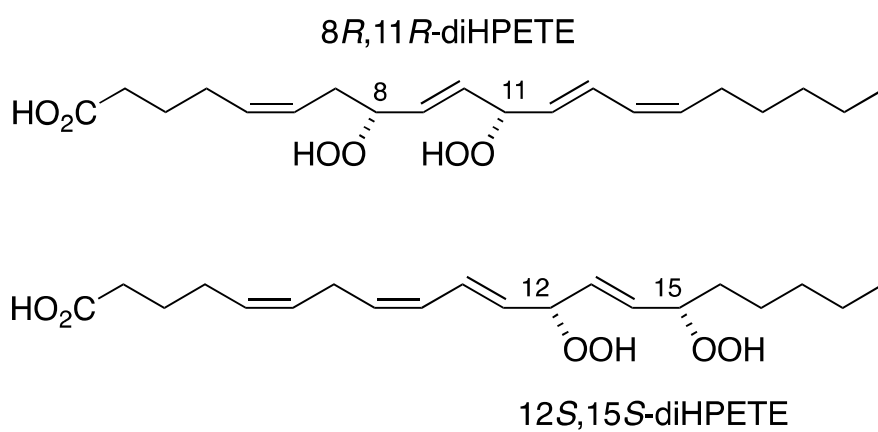

### Supplementary References

- (1) Lin, J., Welti, D. H., Vera, F. A., Fay, L. B., and Blank, I. (1999) Synthesis of deuterated volatile lipid degradation products to be used as internal standards in isotope dilution assays. 2. Vinyl ketones. *J. Agric. Food Chem.*, *47*, 2822-2829.
- (2) Cheng, Y., Huynh-Ba, T., Blank, I., and Robert, F. (2008) Temporal changes in aroma release of Longjing tea infusion: interaction of volatile and nonvolatile tea components and formation of 2-butyl-2-octenal upon aging. *J. Agric. Food Chem.*, *56*, 2160-2169.
- (3) Weerapana, E., Simon, G. M., and Cravatt, B. F. (2008) Disparate proteome reactivity profiles of carbon electrophiles. *Nature Chem. Biol.*, *4*, 405-407.
- (4) Lin, J., Fay, L. B., Welti, D. H., and Blank, I. (2001) Quantification of key odorants formed by autoxidation of arachidonic acid using isotope dilution assay. *Lipids*, *36*, 749-756.
